# Supplementary material
Source: HighWire-hosted journal article supplement (http://www.cmaj.ca/highwire/filestream/58787/field_highwire_adjunct_files/0/image-sunder-1-at.pdf)

**Appendix 1: Axial computed tomography (CT) scan showing a transverse fracture of the petrous segment of the right temporal bone.** The fracture is lateral to the vestibulocochlear apparatus (black arrow). Pneumocephalus is noted medial to the temporal bone (white arrow), along with fluid in the mastoid antrum and air cells (red arrow), as a result of the fracture. The fluid in the paranasal sinuses is a result of facial fractures that cannot be seen on this image.

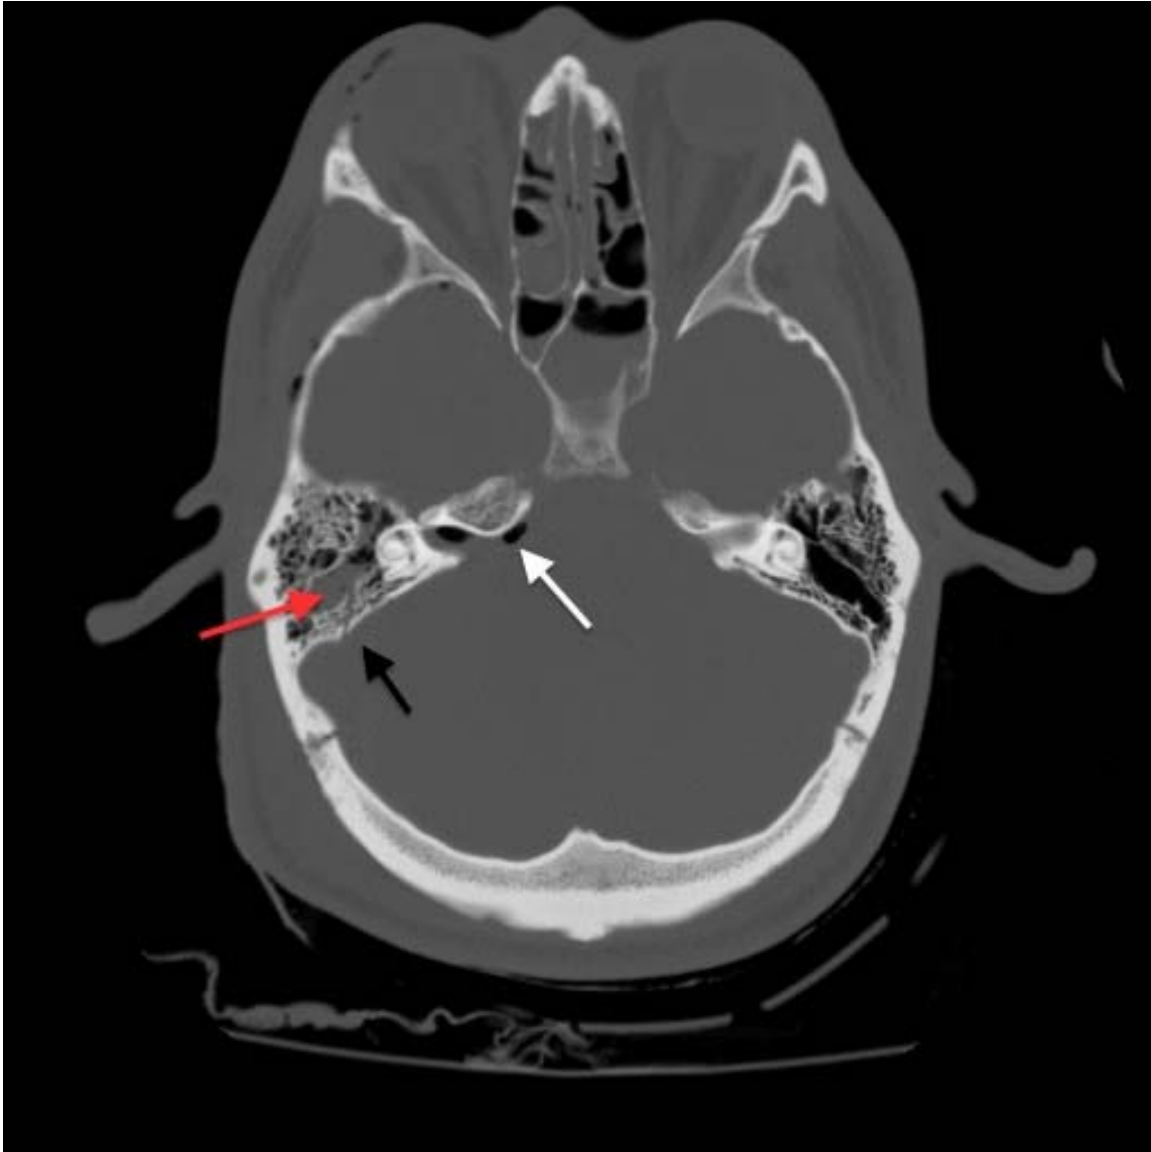

Supplement: image-sunder-1-at.pdf [file image-sunder-1-at.pdf]
